# Supplementary material for: Amaranth Seeds and Sprouts as Functional Ingredients for the Development of Dietary Fiber, Betalains, and Polyphenol-Enriched Minced Tilapia Meat Gels
Source: MDPI journal article supplement (doi:10.3390/molecules28010117), 2022-12-23
Supplement: s1 [file s1]

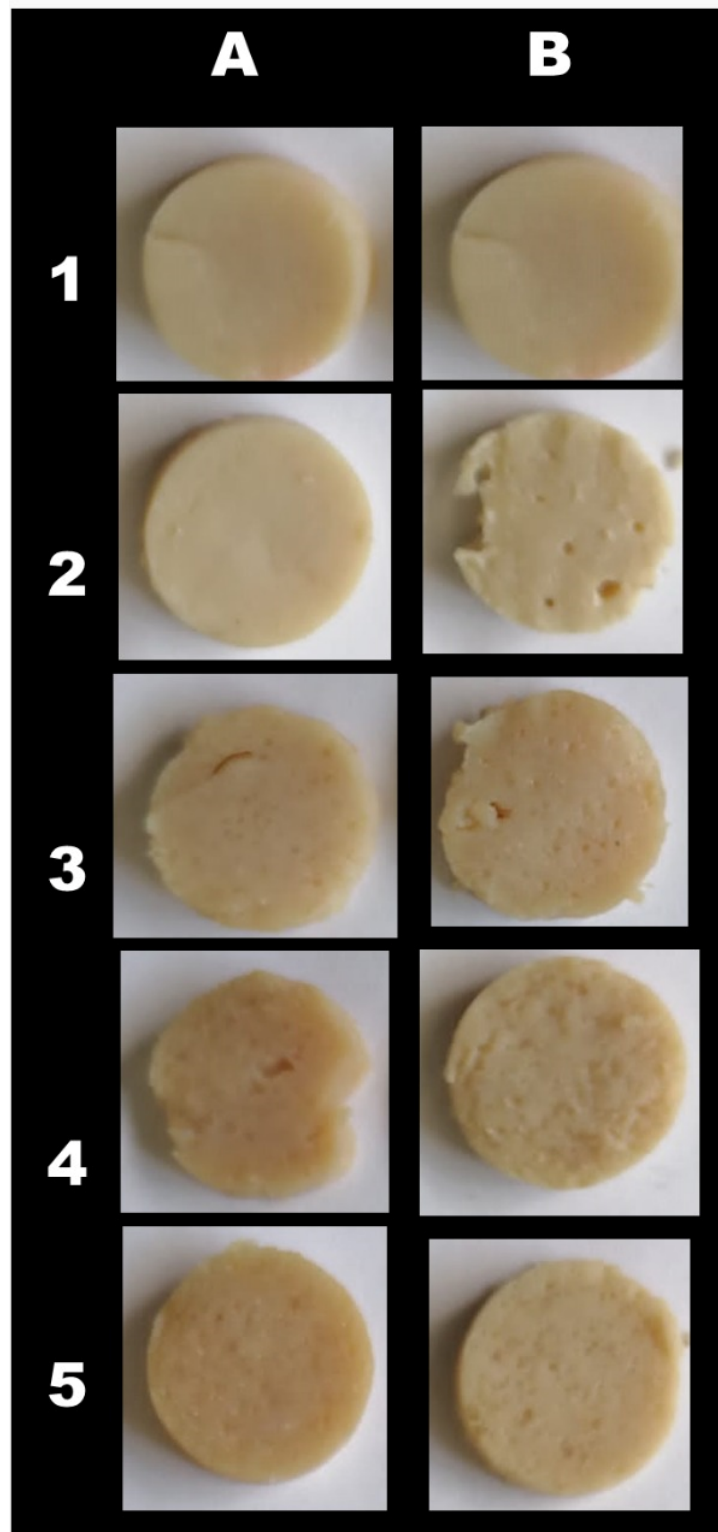

**Figure S1.** Representative photography of control minced tilapia meat gel (1A and 1B), minced tilapia meat gels added with 2, 4, 6, and 10% of amaranth seed flours (2A, 3A, 4A, and 5A, respectively), and minced tilapia meat gels added with 2, 4, 6, and 10% of amaranth sprout flours (2B, 3B, 4B, and 5B).

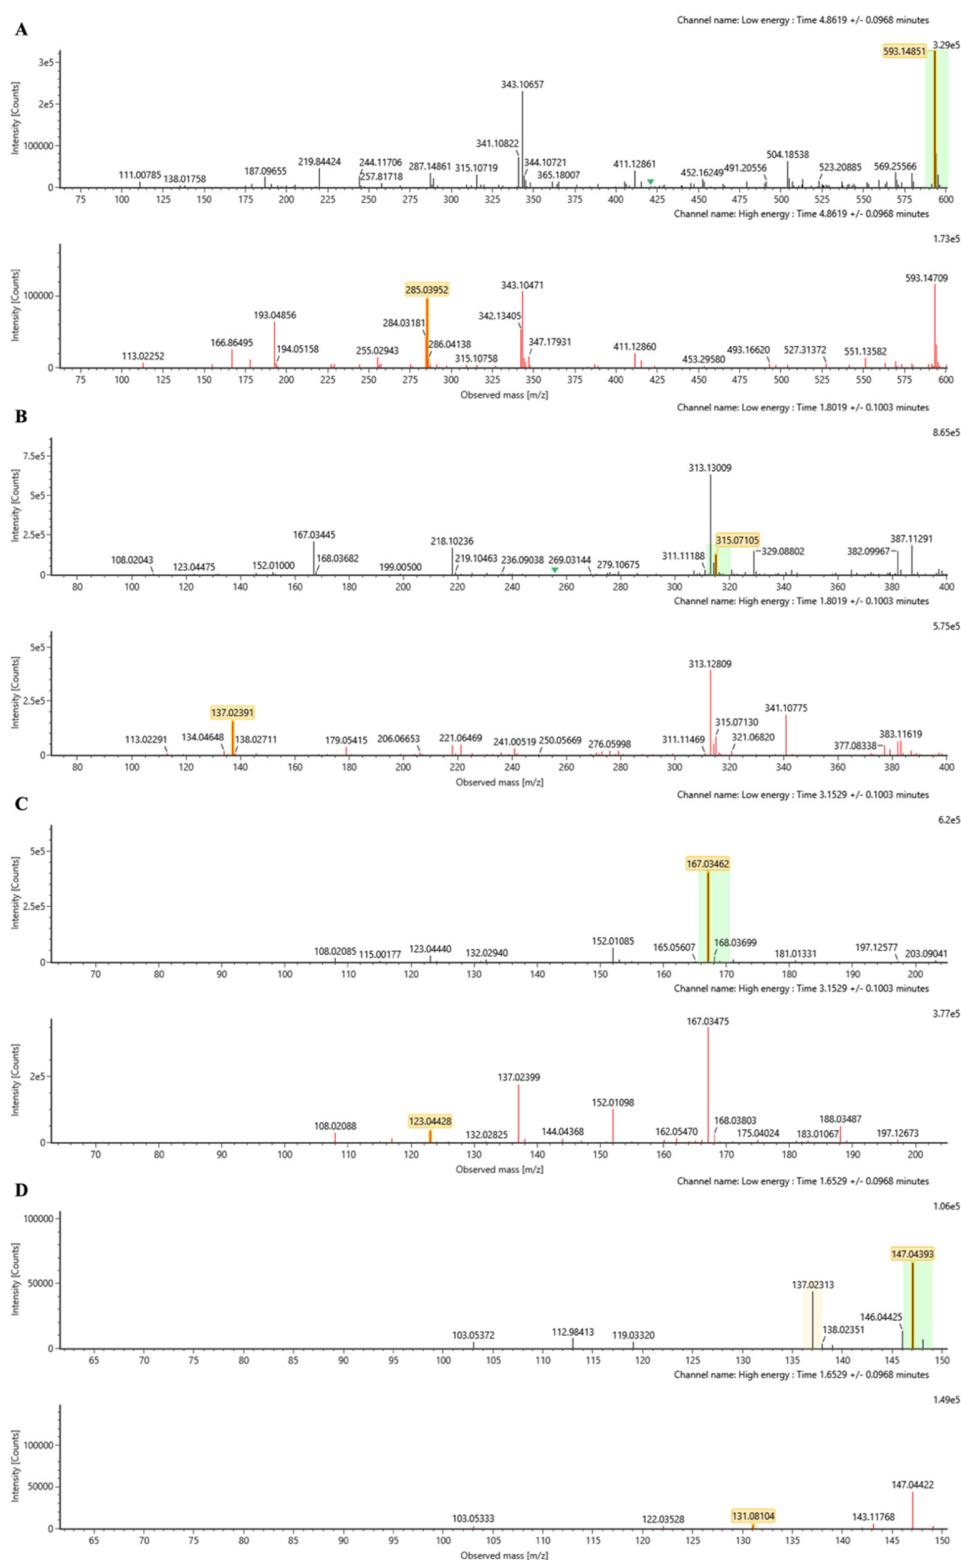

**Figure S2.** High resolution MS<sup>E</sup> spectra at high (superior) and low (inferior) collision energy of the major free polyphenols identified in amaranth seeds and sprouts: kaempferol rutinoside (A), dihydroxybenzoic acid hexoside (B), vanillic acid (C), and cinnamic acid (D).

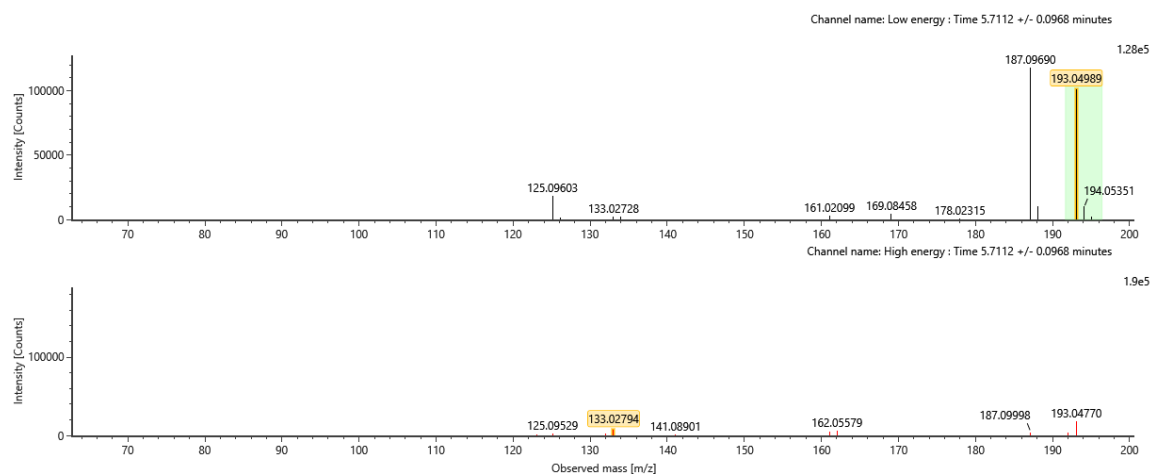

**Figure S3.** High resolution MS<sup>E</sup> spectra at high (superior) and low (inferior) collision energy of ferulic acid, the major bound polyphenol identified in amaranth seeds and sprouts.

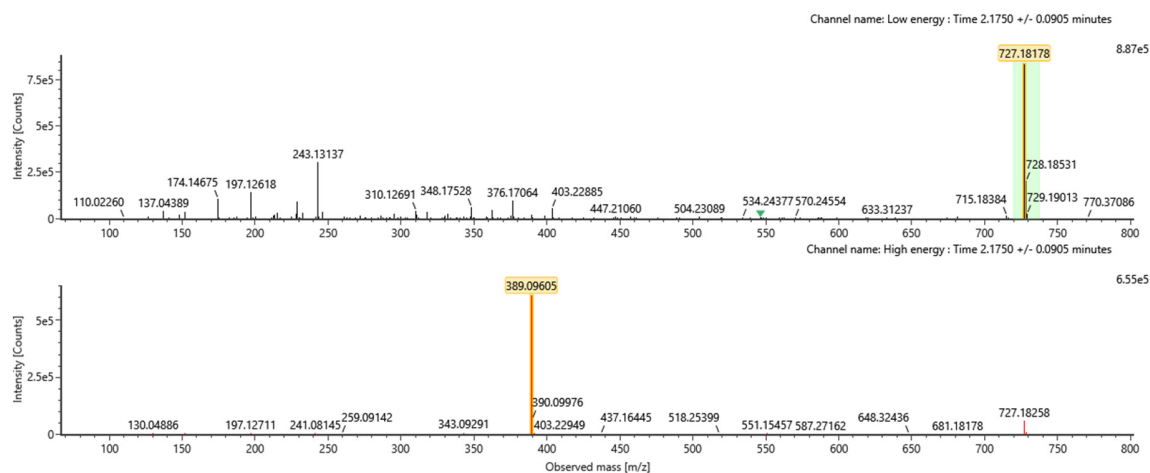

**Figure S4.** High resolution MS<sup>E</sup> spectra at high (superior) and low (inferior) collision energy of betanidin β-glucuronosylglucoside (amaranthin), the major betalain identified in amaranth seeds and sprouts.

**Table S1.** Validation parameters of the UPLC-ESI-QTOF MS<sup>E</sup> method.

| Standard              | Regression model        | Model      | R2 coefficient | LOD (ng/mL) | LOQ (ng/mL) | Quantified compounds                    |
|-----------------------|-------------------------|------------|----------------|-------------|-------------|-----------------------------------------|
| Rutin                 | $y = 421.62 + 394.13$   | Linear fit | 0.9981         | 0.02        | 0.06        | Quercetin derivatives                   |
| Kaempferol            | $y = 583.12 + 154.11$   | Linear fit | 0.9992         | 0.01        | 0.02        | Kampferol derivatives                   |
| Apigenin              | $y = 689.48 + 773.49$   | Linear fit | 0.9983         | 0.02        | 0.08        | Apigenin derivatives                    |
| Daidzein              | $y = 746.53 - 1021.22$  | Linear fit | 0.9987         | 0.03        | 0.09        | Daidzein derivatives                    |
| Glycitein             | $y = 938.49 - 874.83$   | Linear fit | 0.9991         | 0.02        | 0.07        | Glycytein derivatives                   |
| Genistein             | $y = 808.31 - 1149.12$  | Linear fit | 0.9993         | 0.03        | 0.10        | Genistein derivatives                   |
| 4-Hydroxybenzoic acid | $y = 1603.14 + 902.31$  | Linear fit | 0.9977         | 0.01        | 0.03        | Hydroxybenzoic acid and its derivatives |
| Vanillic acid         | $y = 1376.35 + 889.38$  | Linear fit | 0.9981         | 0.01        | 0.05        | Vanillic acid                           |
| Cinnamic acid         | $y = 4035.50 + 1603.44$ | Linear fit | 0.9975         | 0.01        | 0.03        | Cinnamic acid                           |
| Caffeic acid          | $y = 4489.38 - 1288.31$ | Linear fit | 0.9992         | 0.01        | 0.02        | Caffeic acid                            |
| Ferulic acid          | $y = 5010.94 + 1661.77$ | Linear fit | 0.9956         | 0.01        | 0.02        | Ferulic acid and its derivatives        |
| Betanin               | $y = 3384.22 + 1001.39$ | Linear fit | 0.9963         | 0.01        | 0.02        | (Iso)amaranthine                        |

Calibration curves were constructed from six different concentrations for each standard and were analyzed by triplicate. LOD: limit of detection; LOQ: limit of quantification.

**Table S2.** Nutritional composition of amaranth seed and sprout flours.

| Component <sup>1</sup>     | Samples             |                       |
|----------------------------|---------------------|-----------------------|
|                            | Amaranth seed flour | Amaranth sprout flour |
| Protein                    | 17.23 ± 0.38a       | 15.75 ± 0.01b         |
| Lipid                      | 6.18 ± 0.34a        | 5.07 ± 0.02b          |
| Carbohydrates <sup>2</sup> | 67.27 ± 0.95a       | 70.48 ± 0.04b         |
| Crude fiber                | 13.83 ± 0.75b       | 42.59 ± 1.27a         |
| Ash                        | 2.82 ± 0.13a        | 3.04 ± 0.13a          |
| Moisture                   | 6.49 ± 0.10a        | 5.66 ± 0.09b          |

Data are shown as mean ± standard deviation of three replicates. Different letters indicate significant ( $p < 0.05$ ) differences between samples by Student's t test. Data are expressed as <sup>1</sup>% on db. <sup>2</sup> Calculated by difference. db: dry basis.

**Table S3.** Free and bound polyphenol and betalain content of amaranth seed and sprout flours.

| Component <sup>1</sup>              | Samples             |                       |
|-------------------------------------|---------------------|-----------------------|
|                                     | Amaranth seed flour | Amaranth sprout flour |
| Free polyphenols <sup>1</sup>       | 106.17 ± 3.20b      | 304.70 ± 8.17a        |
| Free flavonoids <sup>2</sup>        | 107.66 ± 6.83b      | 203.08 ± 6.32a        |
| Free proanthocyanidins <sup>3</sup> | 3.75 ± 0.30a        | 4.58 ± 0.19a          |
| Bound polyphenols <sup>1</sup>      | 141.33 ± 5.97a      | 122.38 ± 4.52a        |
| Betacyanins <sup>4</sup>            | 6.31 ± 0.22b        | 14.70 ± 0.81a         |
| Betaxanthins <sup>5</sup>           | 3.87 ± 0.04b        | 5.03 ± 0.01a          |
| Betalamic acid <sup>6</sup>         | 6.59 ± 0.17a        | 6.84 ± 0.17a          |

Data are shown as mean ± standard deviation of three replicates. Different letters indicate significant (p<0.05) differences between samples by Student's t test. Data are expressed as <sup>1</sup>mg of gallic acid equivalents/100 g db; <sup>2</sup>mg of rutine equivalents/100 g db; <sup>3</sup>mg of proanthocyanidins equivalents/100 g db; <sup>4</sup>mg of betacyanin equivalents/100 g db; <sup>5</sup>mg of betaxanthin equivalents/100 g db; <sup>6</sup>mg of betalamic acid/100 g db. Db: dry basis.

**Table S4.** Free and bound polyphenol and betalain profile of amaranth seed and sprout flours.

| Compound                                           | Rt<br>(min) | Molecular<br>formula | Expected<br>mass (Da) | Observed<br>mass (Da) | Error<br>(ppm) | Adducts            | Fragments                     | Concentration <sup>1</sup> |                          |
|----------------------------------------------------|-------------|----------------------|-----------------------|-----------------------|----------------|--------------------|-------------------------------|----------------------------|--------------------------|
|                                                    |             |                      |                       |                       |                |                    |                               | Amarnath<br>seed flour     | Amaranth<br>sprout flour |
| Free polyphenols                                   |             |                      |                       |                       |                |                    |                               |                            |                          |
| Flavonols                                          |             |                      |                       |                       |                |                    |                               |                            |                          |
| Quercetin rutinoside (rutin)*                      | 3.96        | C27H30O16            | 610.1534              | 609.1505              | 7.1979         | [M-H] <sup>-</sup> | 301.06609,151.00078           | 2.33 ± 0.08b               | 4.89 ± 0.09a             |
| Kaempferol rutinoside                              | 4.86        | C27H30O15            | 594.1585              | 593.1485              | -4.5216        | [M-H] <sup>-</sup> | 285.03952                     | 5.89 ± 0.03b               | 10.58 ± 0.46a            |
| Hydroxybenzoic acids                               |             |                      |                       |                       |                |                    |                               |                            |                          |
| Hydroxybenzoic acid hexoside                       | 1.57        | C13H16O8             | 300.0845              | 299.0751              | -7.2877        | [M-H] <sup>-</sup> | 137.02336,108.02008           | 2.34 ± 0.01b               | 3.67 ± 0.18a             |
| Hydroxybenzoic acid*                               | 1.64        | C7H6O3               | 138.0317              | 137.0231              | -9.3752        | [M-H] <sup>-</sup> | 108.02008                     | ND                         | 4.18 ± 0.08              |
| Dihydroxybenzoic acid hexoside                     | 1.79        | C13H16O9             | 316.0794              | 315.0711              | -3.1993        | [M-H] <sup>-</sup> | 152.99288,137.02348,101.02349 | 8.69 ± 0.46a               | 5.16 ± 0.09b             |
| Vanillic acid*                                     | 3.16        | C8H8O4               | 168.0423              | 167.0344              | -3.1996        | [M-H] <sup>-</sup> | 123.04428,108.02088           | 19.57 ± 0.65a              | 11.83 ± 1.38b            |
| Hydroxycinnamic acids                              |             |                      |                       |                       |                |                    |                               |                            |                          |
| Cinammic acid*                                     | 1.65        | C9H8O2               | 148.0524              | 147.0439              | -8.3188        | [M-H] <sup>-</sup> | 131.08104, 203.05333          | 4.32 ± 0.37a               | 1.85 ± 0.13b             |
| Ferulic acid hexoside                              | 2.90        | C16H20O9             | 356.1107              | 355.1024              | -2.8468        | [M-H] <sup>-</sup> | 193.04982,179.03315,134.03649 | 0.88 ± 0.01b               | 1.18 ± 0.04a             |
| Caffeic acid*                                      | 3.02        | C9H8O4               | 180.0423              | 179.0338              | -6.6884        | [M-H] <sup>-</sup> | 135.04407                     | ND                         | 2.27 ± 0.22              |
| Feruloylquinic acid                                | 3.93        | C17H20O9             | 368.1107              | 367.1008              | -7.3119        | [M-H] <sup>-</sup> | 193.05008,191.01920,134.03676 | ND                         | 0.79 ± 0.02              |
| Ferulic acid*                                      | 5.71        | C10H10O4             | 194.0579              | 193.0499              | -3.8388        | [M-H] <sup>-</sup> | 178.02315,133.02794           | ND                         | 1.82 ± 0.03              |
| Bound polyphenols                                  |             |                      |                       |                       |                |                    |                               |                            |                          |
| Hydroxycinnamic acids                              |             |                      |                       |                       |                |                    |                               |                            |                          |
| Ferulic acid*                                      | 5.71        | C10H10O4             | 194.0579              | 193.0505              | -0.5000        | [M-H] <sup>-</sup> | 178.02315,133.02794           | ND                         | 10.24 ± 0.01             |
| Betalains                                          |             |                      |                       |                       |                |                    |                               |                            |                          |
| Betacyanins                                        |             |                      |                       |                       |                |                    |                               |                            |                          |
| Betanidin β-glucuronosylhexoside (amaranthin)      | 2.19        | C30H34N2O19          | 726.1756              | 727.1818              | -1.4827        | [M+H] <sup>+</sup> | 551.15457,389.09605           | ND                         | 2.40 ± 0.05              |
| Isobetandin β-glucuronosylhexoside (isoamaranthin) | 2.57        | C30H34N2O19          | 726.1756              | 727.1829              | 0.0657         | [M+H] <sup>+</sup> | 551.15457,389.09688           | ND                         | 0.33 ± 0.01              |

Data are shown as mean ± standard deviation of three replicates. Results are expressed as mg/100 g db. Data are expressed as <sup>1</sup>μmol Trolox equivalents/100 g db. Different letters indicate significant (p<0.05) differences between samples by Student's t test.

\*Identification confirmed with commercial standards. Db: dry basis.



**Table S5.** Total antioxidant capacity of amaranth seed and sprout flours.

| <b>Antioxidant capacity</b> | <b>Samples</b>             |                              |
|-----------------------------|----------------------------|------------------------------|
|                             | <b>Amaranth seed flour</b> | <b>Amaranth sprout flour</b> |
| Q-ABTS assay                | 9.69 ± 0.72b               | 119.34 ± 3.84a               |
| Q-DPPH assay                | 36.12 ± 2.41b              | 56.60 ± 2.91a                |

Data are shown as mean ± standard deviation of three replicates. Different letters indicate significant ( $p < 0.05$ ) differences between samples. Q: QUENCHER; ABTS: 2,2'-azino-bis(3-ethylbenzo-thiazoline-6-sulfonic acid); DPPH: 2,2-diphenyl-1-picrylhydrazyl; db: dry basis; ND: not detected.
